# Supplementary material
Source: PubMed Central journal article supplement (PMC2877950)
Supplement: JCI41541sd.pdf [file JCI41541sd.pdf]

Supplemental Figures

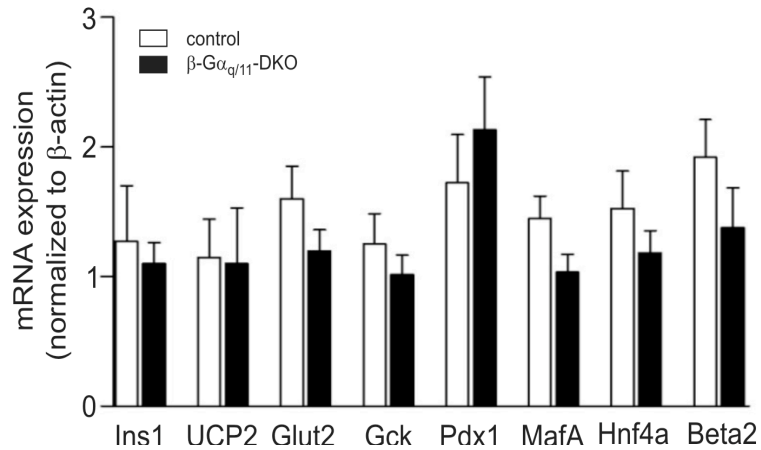

**Supplemental Figure 1:** Expression of marker genes in isolated islets from control mice and  $\beta$ -G $\alpha_q$ /G $\alpha_{11}$ -DKOs as determined by reverse transcription polymerase chain reaction. Data were normalized to  $\beta$ -actin. Gck, Glucokinase; Glut2, Glucose transporter 2; Hnf4a, hepatocyte-associated transcription factor-4; Ins1, Insulin -1; Pdx1, pancreatic and duodenal homeobox 1; UCP2, uncoupling protein 2.

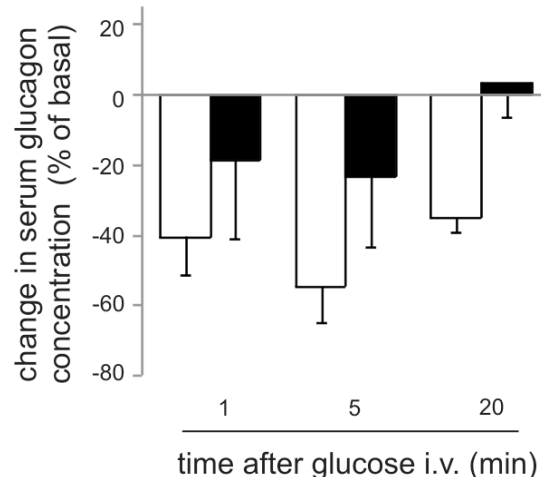

**Supplemental Figure 2:** Reduction of serum glucagon levels after intravenous glucose injection (1 mg/g) in fasted control mice (white bars) and  $\beta$ -G $\alpha_q$ /G $\alpha_{11}$ -DKOs (black bars) (expressed as % reduction compared to glucagon concentration before glucose application).

## Supplemental Methods

### RT-PCR

mRNA from isolated pancreatic islets was prepared with a RNeasy Mini kit (Qiagen). Reverse transcription was performed according to standard protocols. Amplification was performed with following primers: Ins1 5'-GCTGGTAGAGGGAGCAGATG-3'/5'-CAGAGACCAT-CAGCAAGCAG-3'; Pdx1 5'-TGGCTCTTTTCCCTGAAGAA-3'/5'-CGGTAGCAACCAA-GAGGAAA-3'; Beta2 5'-GCAAAGTGAATCAAAACCAA-3'/5'-GGATTGTTATCAAAGTTGAAAGATG-3'; Glut2 5'-TGATCGGCACAAGTGTGTTT-3'/5'-AGGGAGGG-AGATCGAGAGAG-3'; MafA 5'-GAGGCTCCCCTGTCTCTTCT-3'/5'-GCGTATGCCAT-CACAAACTT-3'; Hnf4a 5'-CAAGCTTGCAAGGCAAATG-3'/5'-GCGAGTGAATGAGT-GAATGG-3'; Gck 5'-GAAGGAGAAGGGGAAGGAGA-3'/5'-ATGTTTCAGGGCTTGTT-CAGG-3'; UCP2 5'-CAGCCAGCGCCAGTACC-3'/5'-CAATGCGGACGGAGGCAAAG-C-3' using the Platinum SYBR Green qPCR SuperMix UGD (Invitrogen Life Technologies) and an ABI PRISM 7700 Sequence detection system (Applied Biosystems). The resulting bands were normalized against  $\beta$ -actin.

### Determination of glucagon levels

Serum glucagon concentrations were measured using a Glucagon RIA kit (Linco Research, St. Charles, MO, USA)
